# Supplementary material
Source: Springer Nature journal article supplement (https://www.springermedizin.de/resource/supplementary/12904_2013_160_MOESM4_ESM.pdf/9517656)
Supplement: MOESM4 [file 9517656]

## *System Structure*

## *Process of Care*

## *Patient Outcomes*

### **Environment Factors**

- Population Density
- Population Demographics
- Community Awareness/ Perceived Importance of Health Issue
- Profession/Specialty Base

### **Network Characteristics**

- History/Evolution
- Network Structure
- Size of Membership
- Extent of Participation in Network among Members
- Policies and Procedures
- Power Equality
- Promotion of Network Ideals
- Vision/Culture

### **Economic Factors**

- Network Resources
- Extent of Volunteerism
- Financial Incentives
- Capacity for 24/7 Care

### **Provider Characteristics**

- Beliefs/Attitudes
- Interpersonal Style
- Job Satisfaction
- Specialty Training and Experience

### **Extent of Collaboration Among Providers**

- Group Commitment
- Common Goals/Shared Values
- Perceived Interdependence
- Reciprocity
- Respect
- Shared Decision-Making and Problem Solving
- Shared Risk/Responsibility
- Trust

### **Information Transfer**

- Communication
- Information Systems and Materials
- Standardized Assessment and Monitoring of Patient Need

### **Organization Factors**

- Careteam Composition
- Educational Opportunities
- Incentives to Encourage Collaboration/Client-centred Care
- Leadership
- Role Recognition
- Standards of Practice
- Process Evaluation and Feedback

### **Satisfaction with Domains of Care and Access**

- Availability of Care
- Free Flow and Accessibility of Information
- Physical Care
- Pain and Symptom Management
- Psychosocial Care
- Management of Expected Death

### **Perceptions of Client-Centredness of Care**

- Appropriate Involvement of Family and Friends
- Collaboration/Team Management
- Education and Shared Knowledge
- Rapport
- Respect for Patient Needs and Preferences
- Sensitivity to Nonmedical and Spiritual Dimensions of Care

### **Perceptions of Continuity of Care**

- Relational
- Informational
- Managerial
